# Supplementary material for: Oxidation-induced phase transformations of hybrid tin bromide single crystals enable the occurrence of second-harmonic generation
Source: Royal Society of Chemistry journal article supplement (doi:10.1039/d2qi02122f), 2022-11-16
Supplement: d2qi02122f1.pdf [file d2qi02122f1.pdf]

## **Electronic Supplementary Information (ESI)**

### **Oxidation-Induced Phase Transformations of Hybrid Tin Bromide Single Crystals Enable the Occurrence of Second-Harmonic Generation**

Binyin Yu,<sup>a</sup> Can Yang,<sup>b</sup> Zhexin Song,<sup>a</sup> Guokui Liu,<sup>\*c</sup> Jing Wei,<sup>d</sup> Qi Wu,<sup>\*b</sup> and Yangyang Dang<sup>\*a</sup>

<sup>a</sup>School of Physics and Physical Engineering, Shandong Provincial Key Laboratory of Laser Polarization and Information Technology, Qufu Normal University, Qufu, Shandong 273165, P. R. China. Email: [dyy@qfnu.edu.cn](mailto:dyy@qfnu.edu.cn)

<sup>b</sup>Hubei Key Laboratory of Pollutant Analysis & Reuse Technology, College of Chemistry and Chemical Engineering, Hubei Normal University, Huangshi, Hubei 435002, China. Email: [wuqi2011@whu.edu.cn](mailto:wuqi2011@whu.edu.cn)

<sup>c</sup>School of Chemistry and Chemical Engineering, Linyi University, Linyi 276000, P. R. China. Email: [liuguokuihappy@163.com](mailto:liuguokuihappy@163.com)

<sup>d</sup>Beijing Key Laboratory of Construction-Tailorable Advanced Functional Materials and Green Applications, Experimental Center of Advanced Materials School of Materials Science and Engineering, Beijing Institute of Technology, Beijing 100081, P. R. China

Corresponding Authors:

Email: [dyy@qfnu.edu.cn](mailto:dyy@qfnu.edu.cn) (Y. D.); [wuqi2011@whu.edu.cn](mailto:wuqi2011@whu.edu.cn) (Q. W.); [liuguokuihappy@163.com](mailto:liuguokuihappy@163.com) (G. L.)

## Table of contents

|                                                                                                                                                                                                                                                                                                                                                                                                                                                                      |    |
|----------------------------------------------------------------------------------------------------------------------------------------------------------------------------------------------------------------------------------------------------------------------------------------------------------------------------------------------------------------------------------------------------------------------------------------------------------------------|----|
| <b>Characterizations</b> .....                                                                                                                                                                                                                                                                                                                                                                                                                                       | 3  |
| <b>Fig. S1.</b> Phase transformation process of TMDPSn <sub>2</sub> Br <sub>6</sub> and TMDPSnBr <sub>6</sub> single crystals. ....                                                                                                                                                                                                                                                                                                                                  | 4  |
| <b>Fig. S2.</b> Crystal structures and XRD patterns of TMDPSn <sub>2</sub> Br <sub>6</sub> and TMDPSnBr <sub>6</sub> . (a) ball–stick diagrams of TMDPSn <sub>2</sub> Br <sub>6</sub> , Note that H atoms bonded to the C or N atoms are omitted for clarity; b) ball–stick diagrams of TMDPSnBr <sub>6</sub> ; (c) powder and simulated XRD patterns of TMDPSn <sub>2</sub> Br <sub>6</sub> ; (d) powder and simulated XRD patterns of TMDPSnBr <sub>6</sub> . .... | 5  |
| <b>Fig. S3.</b> Rietveld refined PXRD profile of (a) DMESnBr <sub>4</sub> . (b) DMESnBr <sub>6</sub> . (c) TMDPSn <sub>2</sub> Br <sub>6</sub> . (d) TMDPSnBr <sub>6</sub> . ....                                                                                                                                                                                                                                                                                    | 5  |
| <b>Fig. S4.</b> Core level XPS spectra for DMESnBr <sub>4</sub> . (a) wide scan, (b) Br 3d, (c) C 1s, (d) N 1s, (e) O 1s and (f) Sn 3d, fitted with peaks having an 80 % Gaussian and 20 % Lorentzian peak shape after applying background subtraction with <i>Shirley function</i> . ....                                                                                                                                                                           | 6  |
| <b>Fig. S5.</b> Core level XPS spectra for DMESnBr <sub>6</sub> . (a) wide scan, (b) Br 3d, (c) C 1s, (d) N 1s, (e) O 1s and (f) Sn 3d, fitted with peaks having an 80 % Gaussian and 20 % Lorentzian peak shape after applying background subtraction with <i>Shirley function</i> . ....                                                                                                                                                                           | 6  |
| <b>Fig. S6.</b> Core level XPS spectra for TMDPSn <sub>2</sub> Br <sub>6</sub> . (a) wide scan, (b) Br 3d, (c) C 1s, (d) N 1s, (e) O 1s and (f) Sn 3d, fitted with peaks having an 80 % Gaussian and 20 % Lorentzian peak shape after applying background subtraction with <i>Shirley function</i> . ....                                                                                                                                                            | 7  |
| <b>Fig. S7.</b> Core level XPS spectra for TMDPSnBr <sub>6</sub> . (a) wide scan, (b) Br 3d, (c) C 1s, (d) N 1s, (e) O 1s and (f) Sn 3d, fitted with peaks having an 80 % Gaussian and 20 % Lorentzian peak shape after applying background subtraction with <i>Shirley function</i> . ....                                                                                                                                                                          | 7  |
| <b>Fig. S8.</b> <sup>13</sup> C-NMR of DMESnBr <sub>4</sub> measured in DMSO-d <sub>6</sub> . ....                                                                                                                                                                                                                                                                                                                                                                   | 8  |
| <b>Fig. S9.</b> <sup>1</sup> H-NMR of DMESnBr <sub>4</sub> measured in DMSO-d <sub>6</sub> . ....                                                                                                                                                                                                                                                                                                                                                                    | 8  |
| <b>Fig. S10.</b> <sup>13</sup> C-NMR of DMESnBr <sub>6</sub> measured in DMSO-d <sub>6</sub> . ....                                                                                                                                                                                                                                                                                                                                                                  | 9  |
| <b>Fig. S11.</b> <sup>1</sup> H-NMR of DMESnBr <sub>6</sub> measured in DMSO-d <sub>6</sub> . ....                                                                                                                                                                                                                                                                                                                                                                   | 9  |
| <b>Fig. S12.</b> <sup>13</sup> C-NMR of TMDPSn <sub>2</sub> Br <sub>6</sub> measured in DMSO-d <sub>6</sub> . ....                                                                                                                                                                                                                                                                                                                                                   | 10 |
| <b>Fig. S13.</b> <sup>1</sup> H-NMR of TMDPSn <sub>2</sub> Br <sub>6</sub> measured in DMSO-d <sub>6</sub> . ....                                                                                                                                                                                                                                                                                                                                                    | 10 |
| <b>Fig. S14.</b> <sup>13</sup> C-NMR of TMDPSnBr <sub>6</sub> measured in DMSO-d <sub>6</sub> . ....                                                                                                                                                                                                                                                                                                                                                                 | 11 |
| <b>Fig. S15.</b> <sup>1</sup> H-NMR of TMDPSnBr <sub>6</sub> measured in DMSO-d <sub>6</sub> . ....                                                                                                                                                                                                                                                                                                                                                                  | 11 |
| <b>Fig. S16.</b> FTIR spectrum of DMESnBr <sub>4</sub> measured by using KBr pellet method. ....                                                                                                                                                                                                                                                                                                                                                                     | 12 |
| <b>Fig. S17.</b> FTIR spectrum of DMESnBr <sub>6</sub> measured by using KBr pellet method. ....                                                                                                                                                                                                                                                                                                                                                                     | 12 |
| <b>Fig. S18.</b> FTIR spectrum of TMDPSn <sub>2</sub> Br <sub>6</sub> measured by using KBr pellet method. ....                                                                                                                                                                                                                                                                                                                                                      | 13 |
| <b>Fig. S19.</b> FTIR spectrum of TMDPSnBr <sub>6</sub> measured by using KBr pellet method. ....                                                                                                                                                                                                                                                                                                                                                                    | 13 |
| <b>Fig. S20.</b> TGA/DSC of DMESnBr <sub>m</sub> (m=4 or 6) and TMDPSn <sub>n</sub> Br <sub>6</sub> (n=1 or 2). ....                                                                                                                                                                                                                                                                                                                                                 | 14 |
| <b>Fig. S21.</b> Solid state UV-vis diffuse spectra at room temperature of a) TMDPSn <sub>2</sub> Br <sub>6</sub> and b). TMDPSnBr <sub>6</sub> . (The insets of a) and b) are tauc plots showing the calculated optical band gap). ....                                                                                                                                                                                                                             | 14 |
| <b>Fig. S22.</b> {SnBr <sub>6</sub> } units and ball-stick diagrams in the crystal structure of DMESnBr <sub>6</sub> . ....                                                                                                                                                                                                                                                                                                                                          | 15 |
| <b>Fig. S23.</b> The dipole moments of organic and inorganic parts in the crystal structure of DMESnBr <sub>6</sub> using Gaussian09 program using B3LYP functional. ....                                                                                                                                                                                                                                                                                            | 15 |
| <b>Table S1.</b> Crystal data of DMESnBr <sub>4</sub> , DMESnBr <sub>6</sub> , TMDPSn <sub>2</sub> Br <sub>6</sub> and TMDPSnBr <sub>6</sub> . ....                                                                                                                                                                                                                                                                                                                  | 16 |
| <b>Table S2.</b> Selected bond lengths (Å) and Bond Valences for DMESnBr <sub>4</sub> , DMESnBr <sub>6</sub> , TMDPSn <sub>2</sub> Br <sub>6</sub> and TMDPSnBr <sub>6</sub> . ....                                                                                                                                                                                                                                                                                  | 18 |
| <b>References</b> .....                                                                                                                                                                                                                                                                                                                                                                                                                                              | 19 |

## Characterizations

**Powder and Single Crystal X-ray Diffraction Measurements.** Powder X-ray diffraction patterns were measured on a PANalytical XPert Pro MPD equipment with Cu-K<sub>a</sub> radiation in the 2θ range of 10-80° using reasonable step size and step time settings. Single-crystal X-ray diffraction data were collected on a Bruker D8 advance diffractometer equipped with a CCD detector (graphite-monochromated Mo-K<sub>a</sub> radiation, λ= 0.71073 Å) at 293(2) K. APEX3 software was used for data integration and cell refinements. The crystal was kept at 293(2) K during data collection. Using Olex2,<sup>1</sup> the structure was solved with the Olex2.solve<sup>2</sup> structure solution program using Charge Flipping and refined with the XL<sup>3</sup> refinement package using Least Squares minimization.

**X-ray Photoelectron Spectroscopy (XPS) Measurements.** Polycrystalline samples were extracted using a sample transporter that protects against air exposure. The sample transporter is connected to the ultra-high vacuum chamber and then transferred to the XPS systems for characterizations. Pass energy values are 160 eV for XPS wide scan, 10 eV for high resolution scan. All the data analysis about XPS was performed using the XPS Peaks Fit software. All the elements were fitted with the 80% Gaussian and 20% Lorentzian peak shapes after applying background subtractions with Shirley function.<sup>4</sup>

**Thermogravimetric Analysis (TGA) and Differential Scan Calorimetry (DSC) Measurements.** Thermogravimetric analysis (TGA) was carried out using a TGA/DSC1/1600HT analyzer (METTLER TOLEDO Instruments). The powder samples were placed in Al<sub>2</sub>O<sub>3</sub> crucible, and heated at a rate of 10 °C min<sup>-1</sup> from room temperature to 600 °C under flowing N<sub>2</sub> gas, respectively. Differential Scan calorimetry (DSC) measurements were performed on Polyma Instruments (DSC-200-F3 Maia).

**IR and <sup>1</sup>H-NMR, <sup>13</sup>C-NMR, measurements of DMESnBr<sub>n</sub> (n=4 or 6) and TMDPSn<sub>n</sub>Br<sub>6</sub> (n=1 or 2).** IR measurement of DMESnBr<sub>n</sub> (n=4 or 6) and TMDPSn<sub>n</sub>Br<sub>6</sub> (n=1 or 2) was performed using KBr pellet method. The <sup>1</sup>H and <sup>13</sup>C Nuclear Magnetic Resonance (NMR) spectra of DMESnBr<sub>n</sub> (n=4 or 6) and TMDPSn<sub>n</sub>Br<sub>6</sub> (n=1 or 2) were recorded in D6-dimethyl sulfoxide (DMSO) using a Bruker Advance 300 spectrometer. The data was delted and analysed with Mestre Nova software.

**UV-Vis Diffuse Reflectance Spectroscopy.** The UV-vis diffuse reflectance spectra of these compounds were recorded at room temperature on a Shimadzu UV-2600 UV-vis spectrophotometer in the wavelength range of 200-800 nm. BaSO<sub>4</sub> powder was used as 100% reflectance reference. The Kubelka-Munk function 3, 4 was used to calculate the absorption spectra from the reflection spectra:  $F(R) = \alpha/S = (1-R)^2/2R$ , where R is the reflectance, α is the absorption coefficient, and S is the scattering coefficient.

**Second-Harmonic Generation Measurements.** The Kurtz and Perry method was used to measure powder second harmonic generation (SHG) signals at room temperature.<sup>5</sup> The SHG efficiency mainly depends on the particle size, and the crystalline compound was ground and divided into the following particle sizes: 20-60, 60-100, 100-125, 125-150, 150-200, 200-300, and 300-400 μm. Microcrystalline KH<sub>2</sub>PO<sub>4</sub> (KDP) with the same particle size was used as a reference. The measurements were performed using Q-switched Nd: YAG lasers with visible light at 1064 nm, and a cut-off filter was used to limit the background flash light on the sample, and the SHG signal is recorded by a photomultiplier tube.

**Piezoelectricity measurement.** We thus used the PiezoTest to investigate its piezoelectric performance through the quasi-static method. The DMESnBr<sub>6</sub> crystal were placed between two

copper foil electrodes and encapsulated with the polyethylene terephthalate (PET) tape to form a simple sandwich-structure powder piezoelectric device, as shown in **Fig. 5**. When the tapping frequency is 110 Hz, the  $d_{22}$  value was measured to be  $\pm 3$  pC/N along the [010] direction for the crystal  $\text{DMESnBr}_6$ .

**Simulation details.** Structural optimization was performed via the Vienna ab initio simulation package (VASP)<sup>6, 7</sup> with the conjugate gradient method. The Perdew, Burke, and Ernzerhof exchange-correlation functional within GGA was used.<sup>8, 9</sup> The convergence of energy between two electronic steps in the self-consistent process was set to  $10^{-5}$  eV. Ionic relaxation was stopped when the maximum force was smaller than  $0.01$  eV/Å. All atoms in the models and cell shape and volume were fully relaxed. The Monkhorst-Pack grids of  $2 \times 2 \times 6$  ( $\text{DMESnBr}_4$ ) and  $5 \times 2 \times 4$  ( $\text{DMESnBr}_6$ ) were used for the reciprocal space sampling.<sup>10</sup> An energy cutoff of 450 eV was adopted for plane-wave expansion of electronic wave functions.

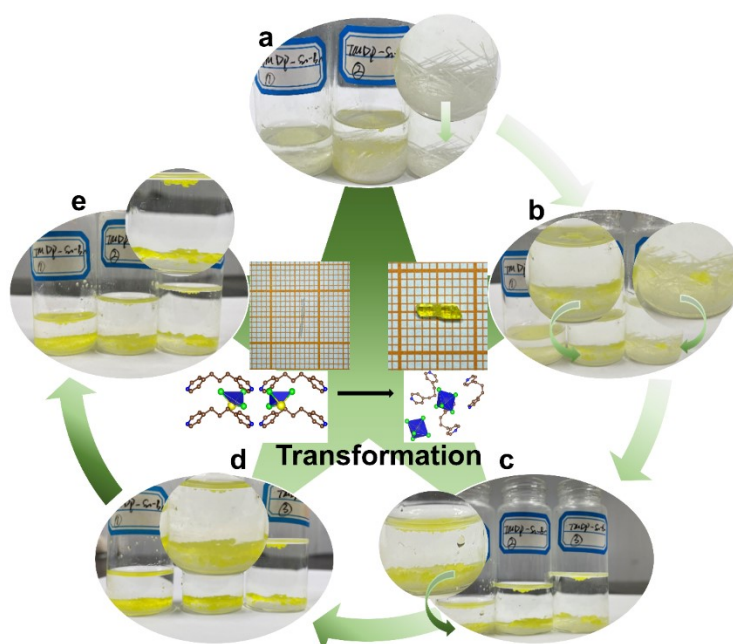

**Fig. S1.** Phase transformation process of  $\text{TMDPSn}_2\text{Br}_6$  and  $\text{TMDPSnBr}_6$  single crystals.

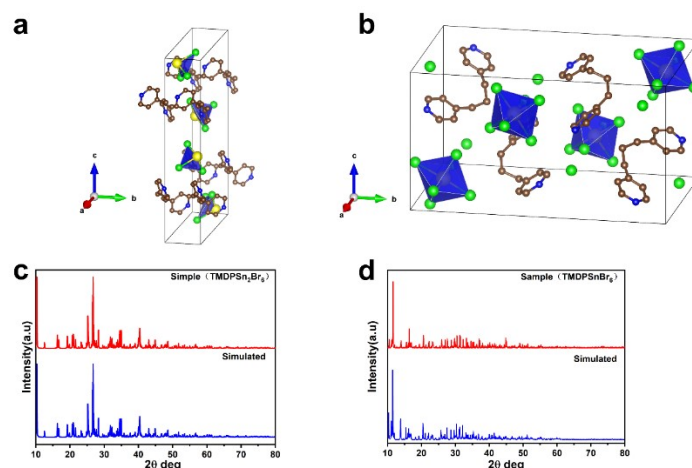

**Fig. S2.** Crystal structures and XRD patterns of TMDPSn<sub>2</sub>Br<sub>6</sub> and TMDPSnBr<sub>6</sub>. (a) ball-stick diagrams of TMDPSn<sub>2</sub>Br<sub>6</sub>, Note that H atoms bonded to the C or N atoms are omitted for clarity; (b) ball-stick diagrams of TMDPSnBr<sub>6</sub>; (c) powder and simulated XRD patterns of TMDPSn<sub>2</sub>Br<sub>6</sub>; (d) powder and simulated XRD patterns of TMDPSnBr<sub>6</sub>.

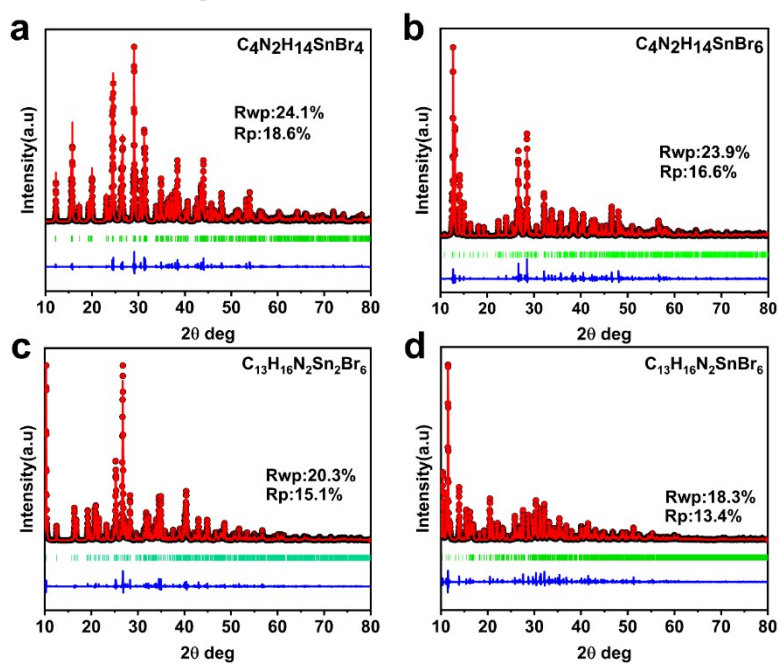

**Fig. S3.** Rietveld refined PXRD profile of (a) DMESnBr<sub>4</sub>. (b) DMESnBr<sub>6</sub>. (c) TMDPSn<sub>2</sub>Br<sub>6</sub>. (d) TMDPSnBr<sub>6</sub>.

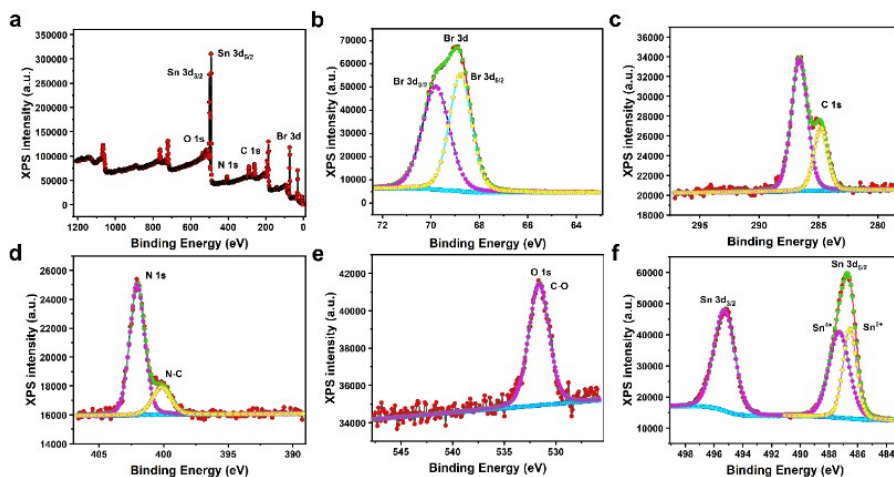

**Fig. S4.** Core level XPS spectra for DMESnBr<sub>4</sub>. (a) wide scan, (b) Br 3d, (c) C 1s, (d) N 1s, (e) O 1s and (f) Sn 3d, fitted with peaks having an 80 % Gaussian and 20 % Lorentzian peak shape after applying background subtraction with *Shirley function*.

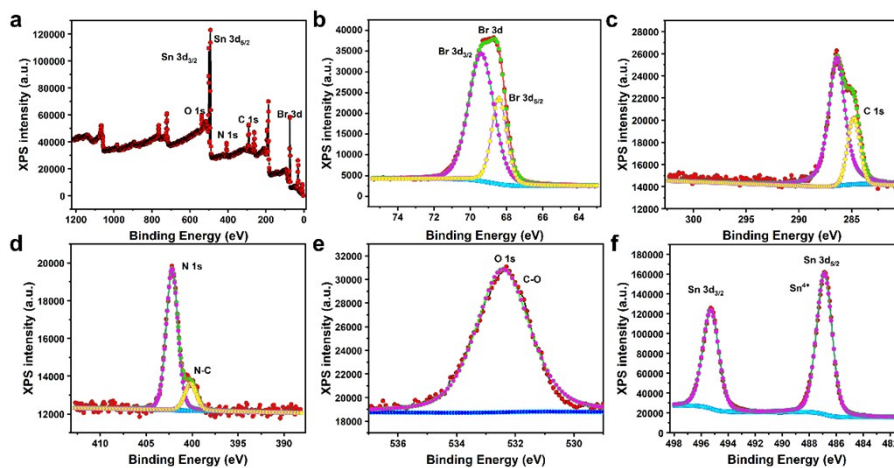

**Fig. S5.** Core level XPS spectra for DMESnBr<sub>6</sub>. (a) wide scan, (b) Br 3d, (c) C 1s, (d) N 1s, (e) O 1s and (f) Sn 3d, fitted with peaks having an 80 % Gaussian and 20 % Lorentzian peak shape after applying background subtraction with *Shirley function*.

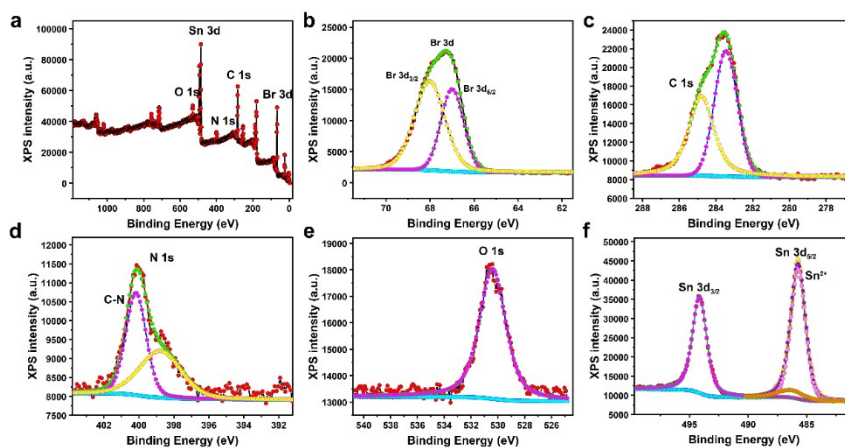

**Fig. S6.** Core level XPS spectra for TMDPSn<sub>2</sub>Br<sub>6</sub>. (a) wide scan, (b) Br 3d, (c) C 1s, (d) N 1s, (e) O 1s and (f) Sn 3d, fitted with peaks having an 80 % Gaussian and 20 % Lorentzian peak shape after applying background subtraction with *Shirley function*.

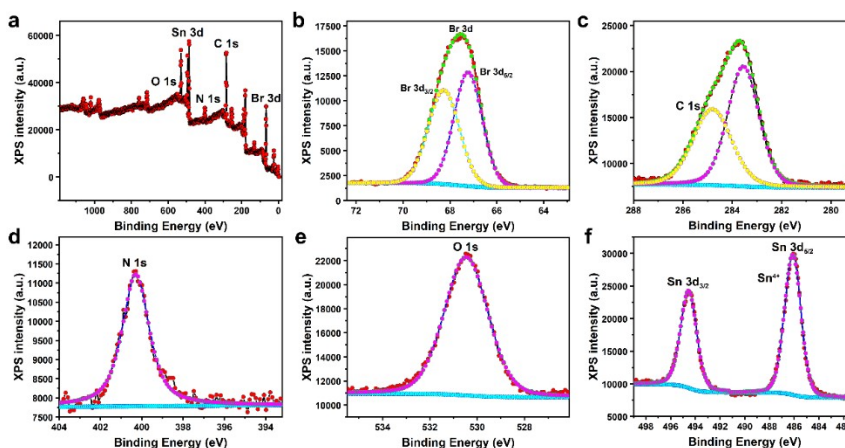

**Fig. S7.** Core level XPS spectra for TMDPSnBr<sub>6</sub>. (a) wide scan, (b) Br 3d, (c) C 1s, (d) N 1s, (e) O 1s and (f) Sn 3d, fitted with peaks having an 80 % Gaussian and 20 % Lorentzian peak shape after applying background subtraction with *Shirley function*.

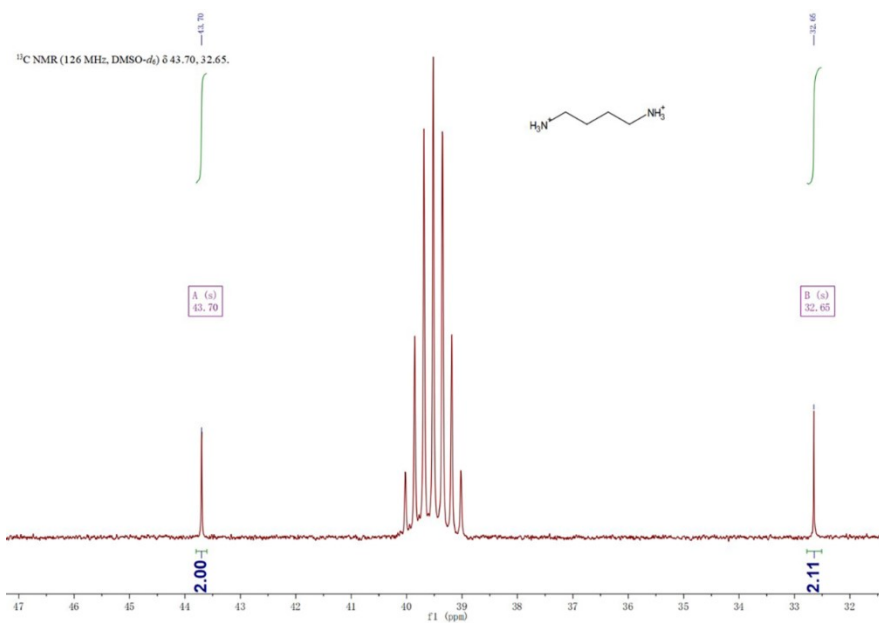

**Fig. S8.** <sup>13</sup>C-NMR of DMESnBr<sub>4</sub> measured in DMSO-*d*<sub>6</sub>.

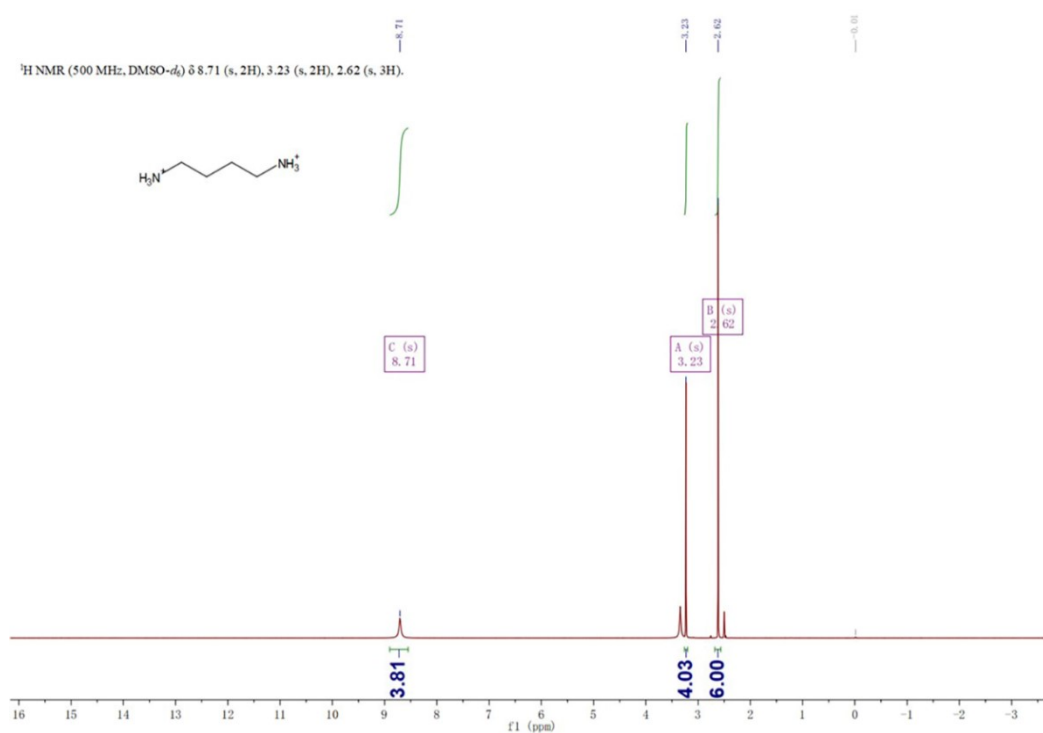

**Fig. S9.** <sup>1</sup>H-NMR of DMESnBr<sub>4</sub> measured in DMSO-*d*<sub>6</sub>.



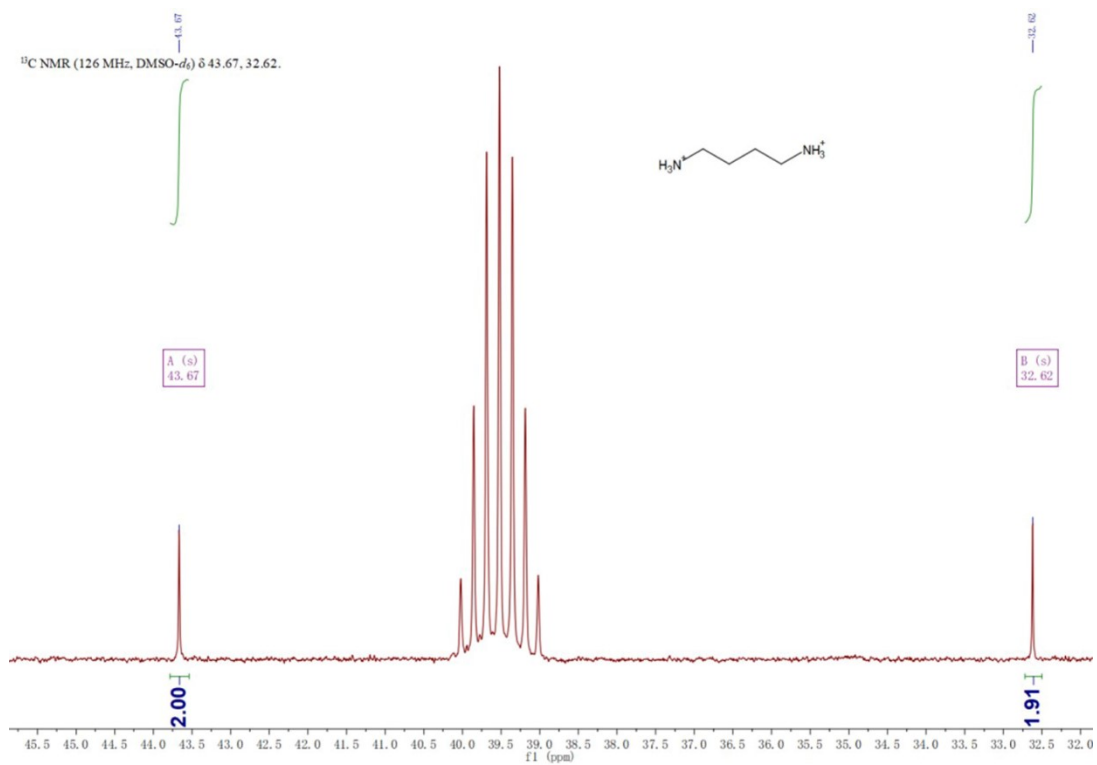

**Fig. S10.**  $^{13}\text{C}$ -NMR of  $\text{DMESnBr}_6$  measured in  $\text{DMSO-d}_6$ .

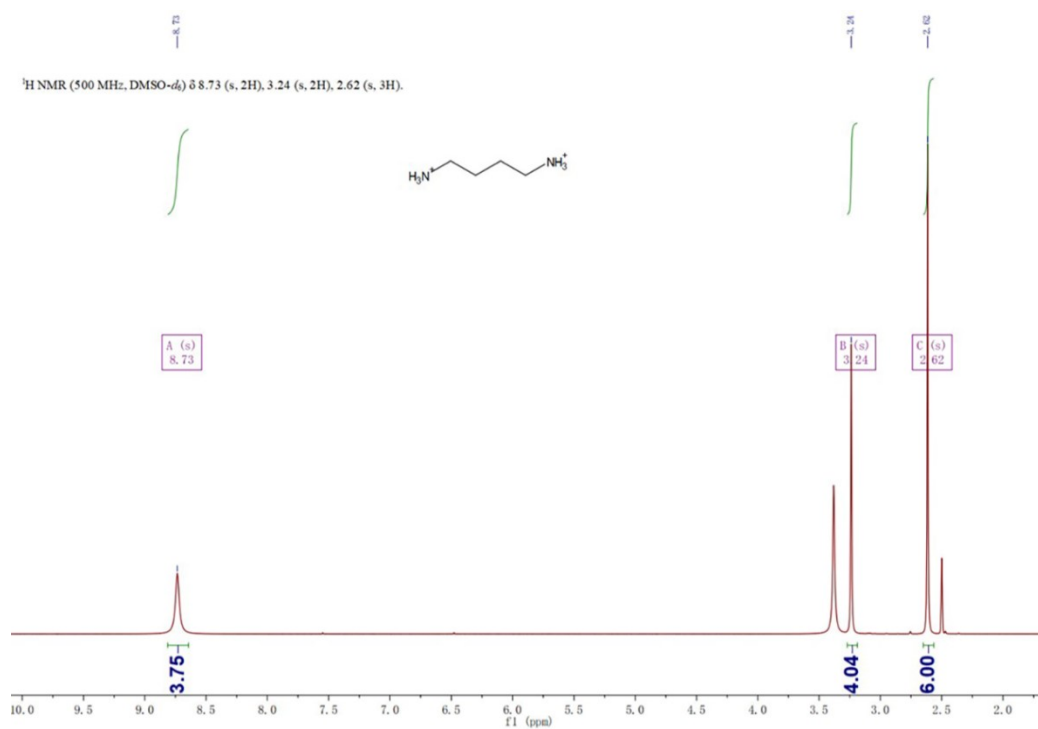

**Fig. S11.**  $^1\text{H}$ -NMR of  $\text{DMESnBr}_6$  measured in  $\text{DMSO-d}_6$ .

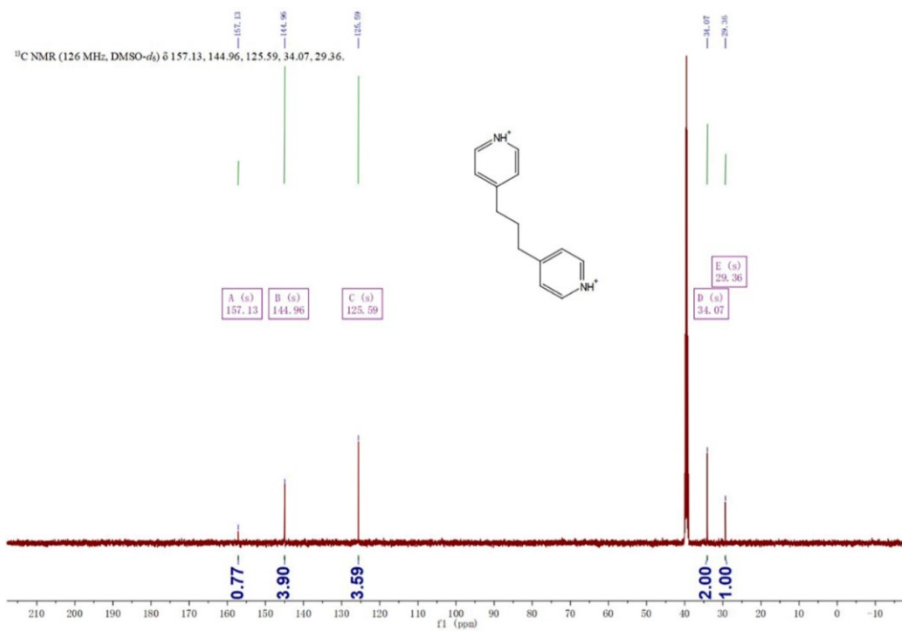

**Fig. S12.** <sup>13</sup>C-NMR of TMDPSn<sub>2</sub>Br<sub>6</sub> measured in DMSO-*d*<sub>6</sub>.

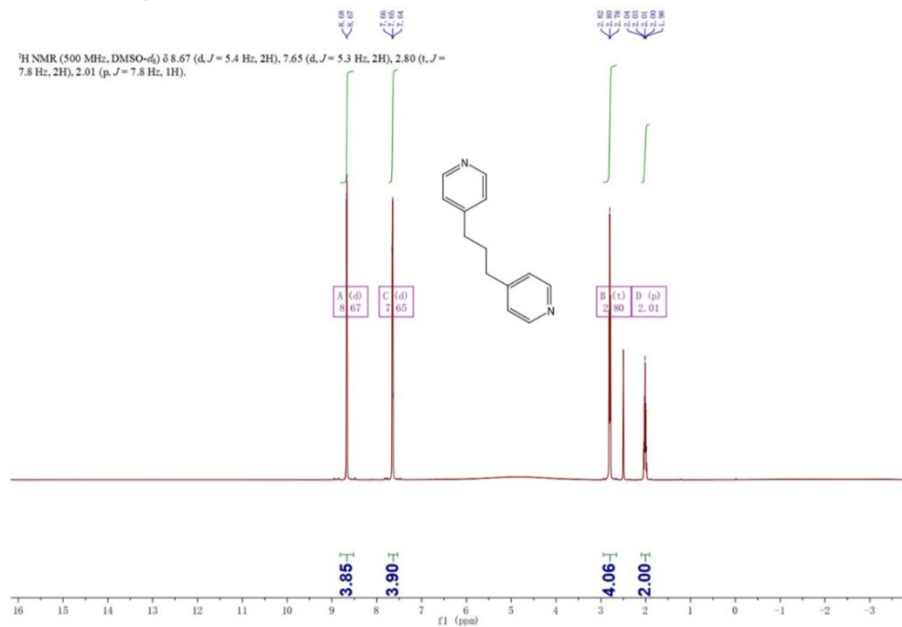

**Fig. S13.** <sup>1</sup>H-NMR of TMDPSn<sub>2</sub>Br<sub>6</sub> measured in DMSO-*d*<sub>6</sub>.

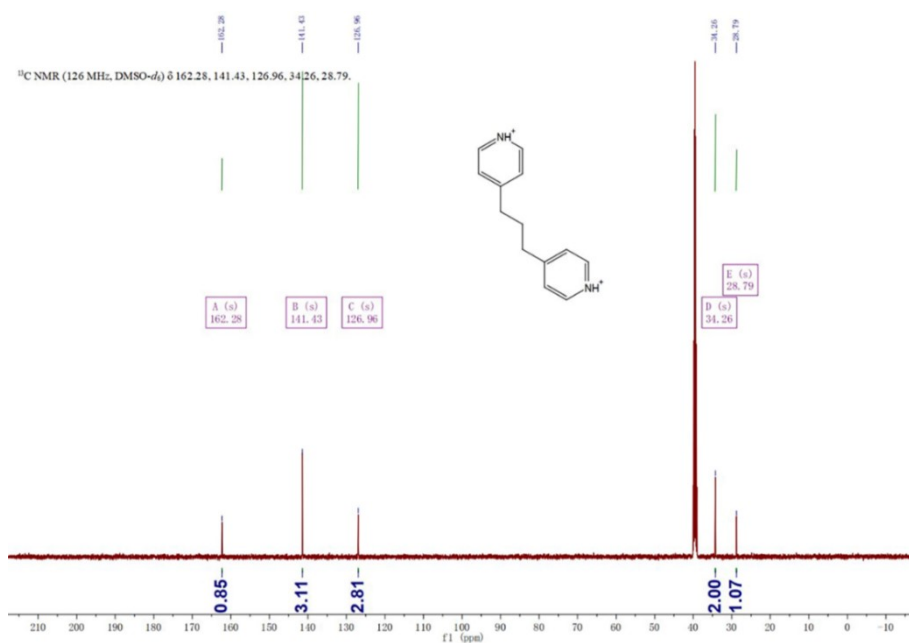

Fig. S14. <sup>13</sup>C-NMR of TMDPSnBr<sub>6</sub> measured in DMSO-*d*<sub>6</sub>.

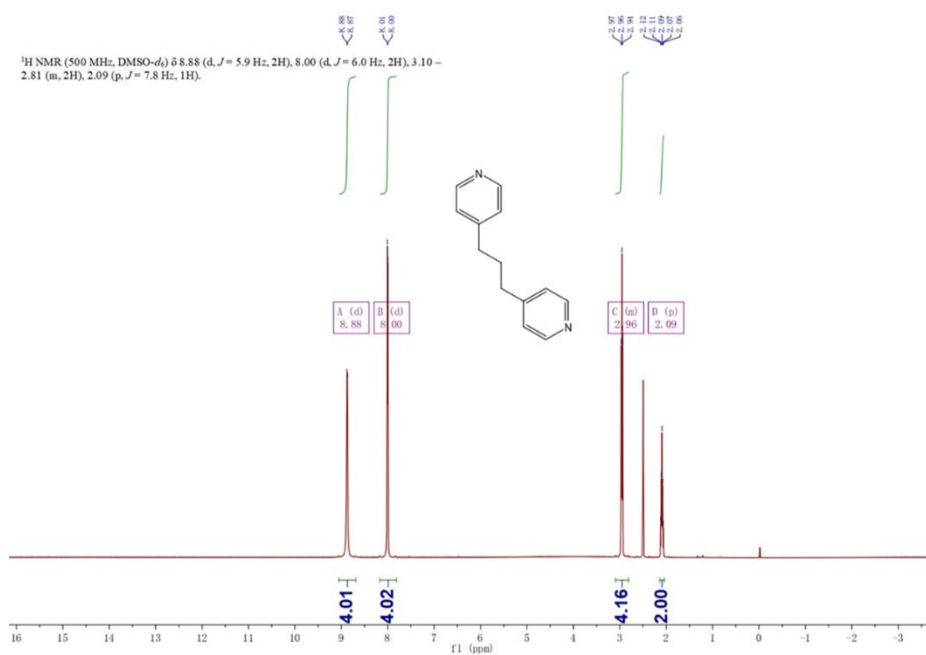

Fig. S15. <sup>1</sup>H-NMR of TMDPSnBr<sub>6</sub> measured in DMSO-*d*<sub>6</sub>.

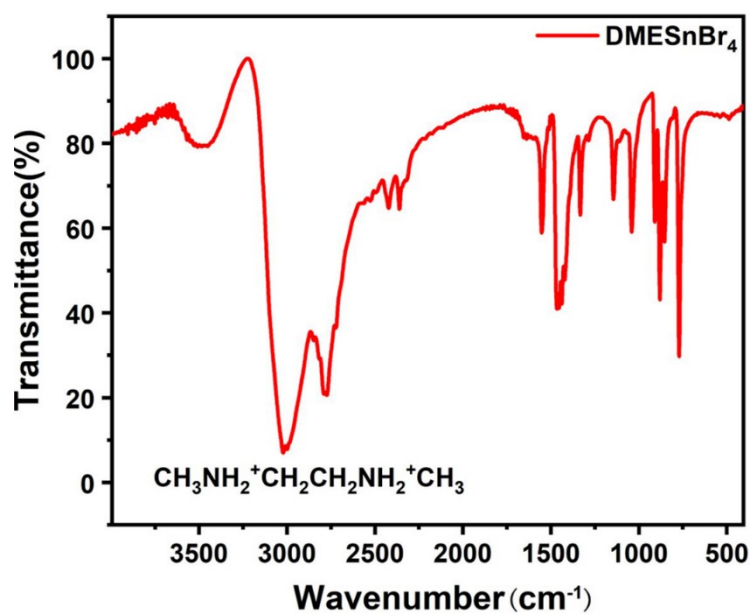

Fig. S16. FTIR spectrum of  $\text{DMESnBr}_4$  measured by using KBr pellet method.

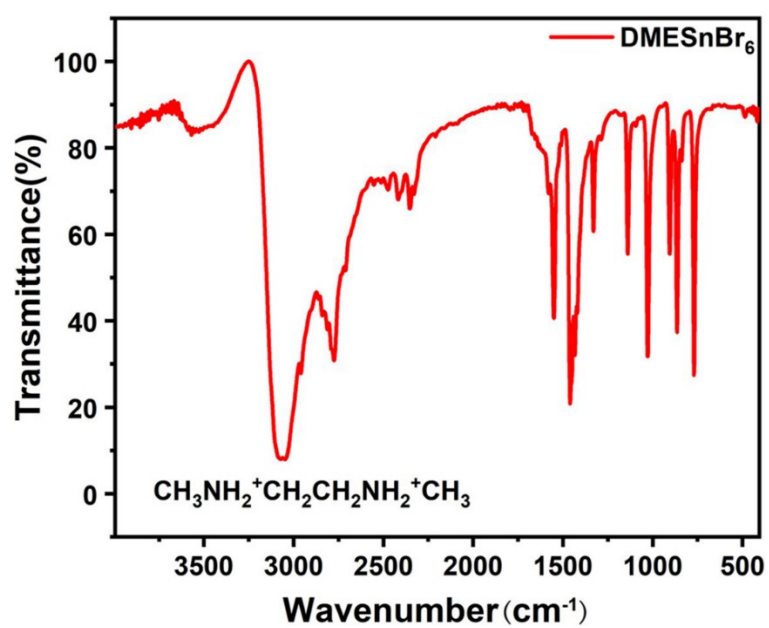

Fig. S17. FTIR spectrum of  $\text{DMESnBr}_6$  measured by using KBr pellet method.

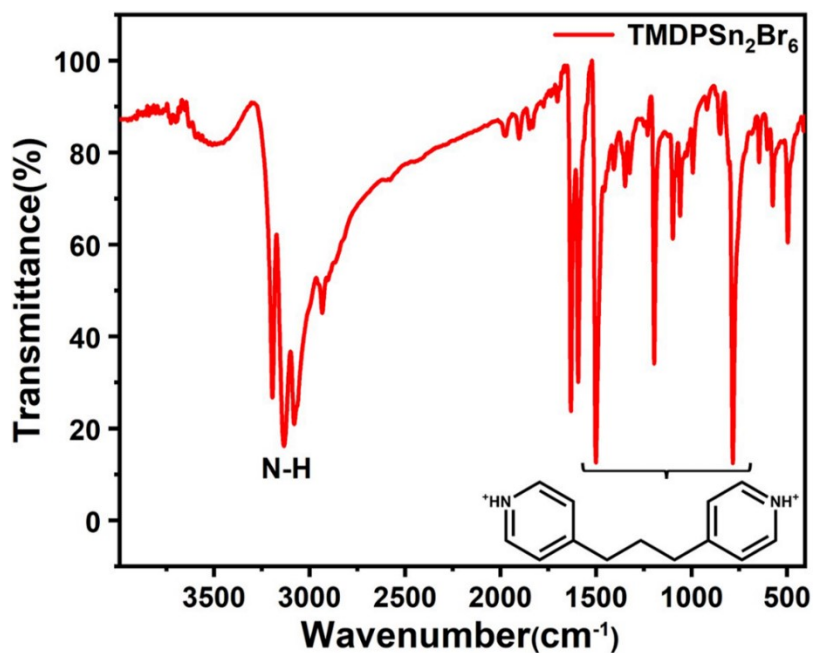

Fig. S18. FTIR spectrum of TMDPSn<sub>2</sub>Br<sub>6</sub> measured by using KBr pellet method.

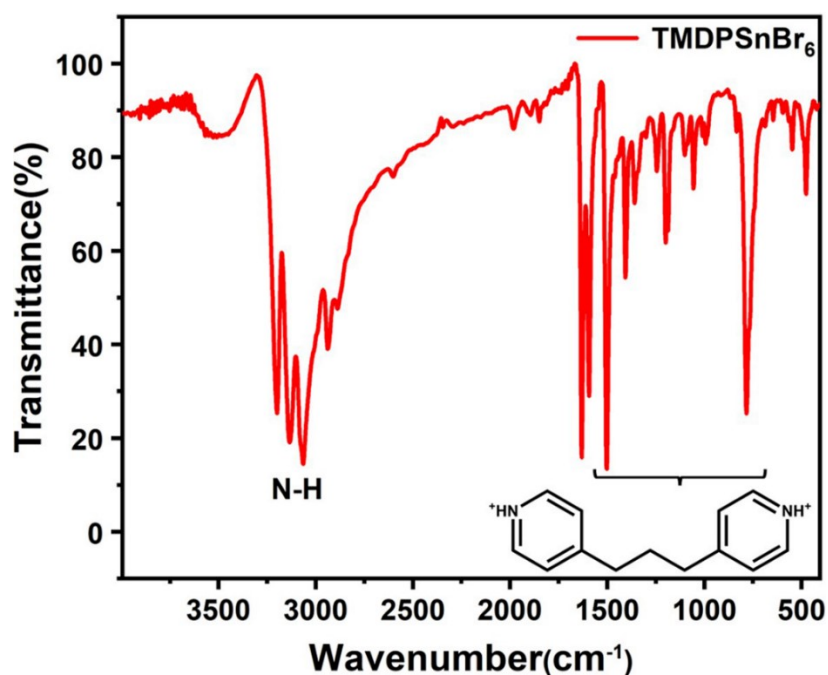

Fig. S19. FTIR spectrum of TMDPSnBr<sub>6</sub> measured by using KBr pellet method.

Table. IR Spectral Data (KBr pellet, cm<sup>-1</sup>).

| Compound                            | Peak position                                                                      |
|-------------------------------------|------------------------------------------------------------------------------------|
| DMESnBr <sub>4</sub>                | 3021 cm <sup>-1</sup> (vs), 3000 cm <sup>-1</sup> (vs), 2959 cm <sup>-1</sup> (s). |
| DMESnBr <sub>6</sub>                | 3073 cm <sup>-1</sup> (vs), 3047 cm <sup>-1</sup> (vs), 2959 cm <sup>-1</sup> (s). |
| TMDPSn <sub>2</sub> Br <sub>6</sub> | 3064 cm <sup>-1</sup> (vs), 1502 cm <sup>-1</sup> (vs), 783 cm <sup>-1</sup> (s).  |
| TMDPSnBr <sub>6</sub>               | 3134 cm <sup>-1</sup> (vs), 1500 cm <sup>-1</sup> (vs), 783 cm <sup>-1</sup> (s).  |

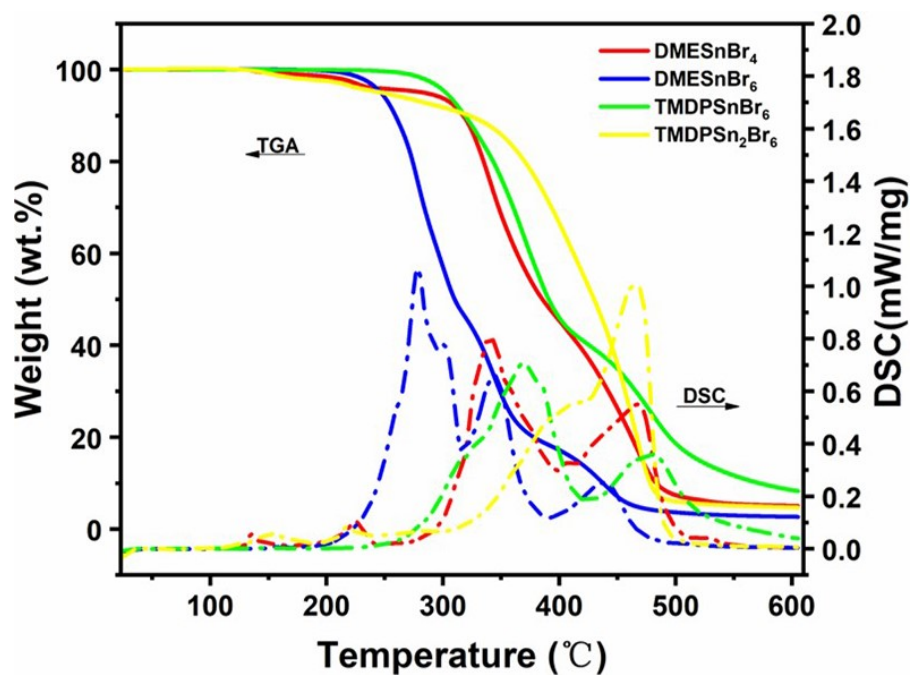

Fig. S20. TGA/DSC of  $\text{DMESnBr}_m$  ( $m=4$  or  $6$ ) and  $\text{TMDPSn}_n\text{Br}_6$  ( $n=1$  or  $2$ ).

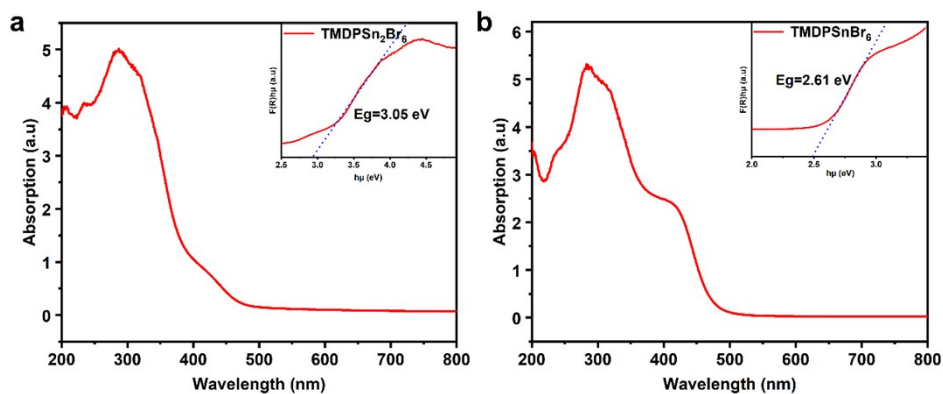

Fig. S21. Solid state UV-vis diffuse spectra at room temperature of a)  $\text{TMDPSn}_2\text{Br}_6$  and b).  $\text{TMDPSnBr}_6$ . (The insets of a) and b) are tauc plots showing the calculated optical band gap).

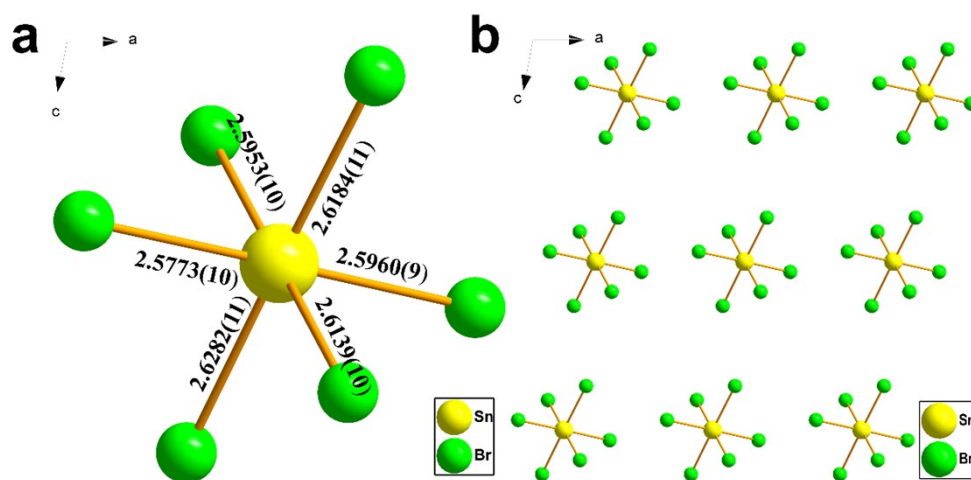

**Fig. S22.** {SnBr<sub>6</sub>} units and ball-stick diagrams in the crystal structure of DMESnBr<sub>6</sub>.

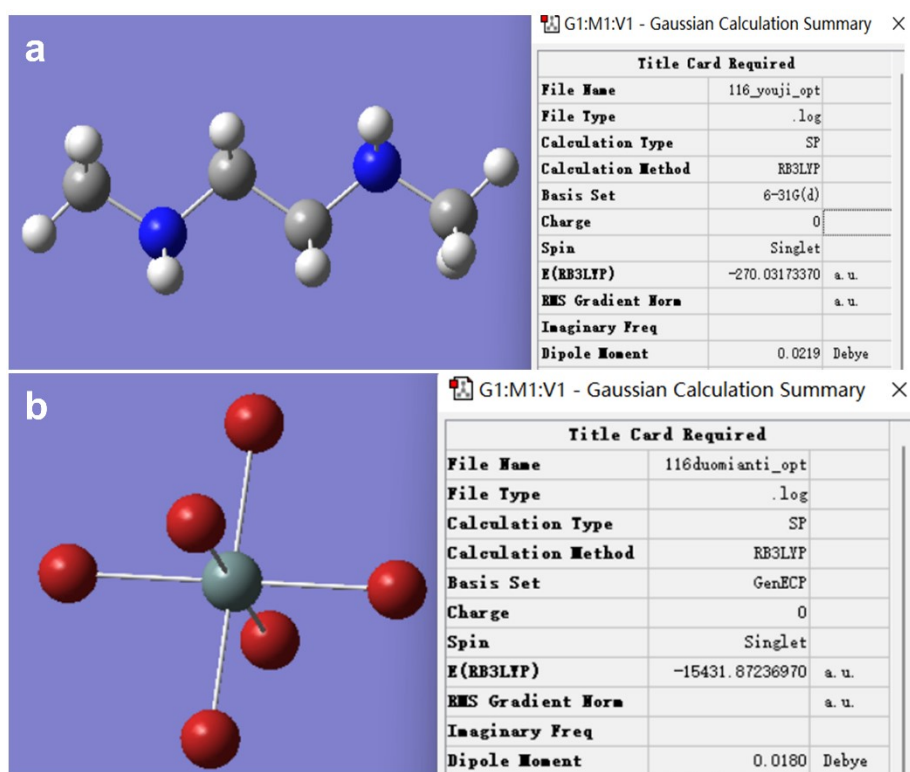

**Fig. S23.** The dipole moments of organic and inorganic parts in the crystal structure of DMESnBr<sub>6</sub> using Gaussian 09 program using B3LYP functional.

**Table S1.** Crystal data of DMESnBr<sub>4</sub>、DMESnBr<sub>6</sub>、TMDPSn<sub>2</sub>Br<sub>6</sub> and TMDPSnBr<sub>6</sub>.

| Identification code              | <b>DMESnBr<sub>4</sub></b>                                       | <b>DMESnBr<sub>6</sub></b>                                       | <b>TMDPSn<sub>2</sub>Br<sub>6</sub></b>                                        | <b>TMDPSnBr<sub>6</sub></b>                                       |
|----------------------------------|------------------------------------------------------------------|------------------------------------------------------------------|--------------------------------------------------------------------------------|-------------------------------------------------------------------|
| Empirical formula                | C <sub>4</sub> H <sub>14</sub> Br <sub>4</sub> N <sub>2</sub> Sn | C <sub>4</sub> H <sub>14</sub> Br <sub>6</sub> N <sub>2</sub> Sn | C <sub>13</sub> H <sub>16</sub> Br <sub>6</sub> N <sub>2</sub> Sn <sub>2</sub> | C <sub>13</sub> H <sub>16</sub> Br <sub>6</sub> N <sub>2</sub> Sn |
| Formula weight                   | 528.50                                                           | 688.32                                                           | 917.12                                                                         | 798.43                                                            |
| Temperature/K                    | 293.15                                                           | 293.15                                                           | 293(2)                                                                         | 293.15                                                            |
| Crystal system                   | Monoclinic                                                       | Monoclinic                                                       | Monoclinic                                                                     | Monoclinic                                                        |
| Space group                      | <i>C</i> 2/m (no.12)                                             | <i>P</i> 2 <sub>1</sub> (no.4)                                   | <i>P</i> 2/c (no.13)                                                           | <i>P</i> 2 <sub>1</sub> /c (no.14)                                |
| <i>a</i> /Å                      | 15.7498(16)                                                      | 7.1983(6)                                                        | 10.7946(3)                                                                     | 8.9183(10)                                                        |
| <i>b</i> /Å                      | 14.5119(15)                                                      | 13.5342(12)                                                      | 4.63560(10)                                                                    | 21.856(2)                                                         |
| <i>c</i> /Å                      | 6.1502(6)                                                        | 8.2833(8)                                                        | 22.9267(6)                                                                     | 11.2936(12)                                                       |
| $\alpha$ /°                      | 90                                                               | 90                                                               | 90                                                                             | 90                                                                |
| $\beta$ /°                       | 111.880(3)                                                       | 100.687(3)                                                       | 101.1280(10)                                                                   | 106.313(4)                                                        |
| $\gamma$ /°                      | 90                                                               | 90                                                               | 90                                                                             | 90                                                                |
| Volume/Å <sup>3</sup>            | 1304.4(2)                                                        | 792.99(12)                                                       | 1125.67(5)                                                                     | 2112.8(4)                                                         |
| <i>Z</i>                         | 4                                                                | 2                                                                | 2                                                                              | 4                                                                 |
| $\rho_{\text{calc}}/\text{cm}^3$ | 2.691                                                            | 2.883                                                            | 2.706                                                                          | 2.510                                                             |
| $\mu/\text{mm}^{-1}$             | 14.168                                                           | 16.697                                                           | 12.867                                                                         | 12.554                                                            |
| F(000)                           | 968.0                                                            | 624.0                                                            | 836.0                                                                          | 1472.0                                                            |
| Crystal size/mm <sup>3</sup>     | 0.15 × 0.12 × 0.1                                                | 0.1 × 0.08 × 0.05                                                | 0.15 × 0.12 × 0.08                                                             | 0.18 × 0.15 × 0.1                                                 |
| Radiation                        | MoK $\alpha$ ( $\lambda$ = 0.71073)                              | MoK $\alpha$ ( $\lambda$ = 0.71073)                              | MoK $\alpha$ ( $\lambda$ = 0.71073)                                            | MoK $\alpha$ ( $\lambda$ = 0.71073)                               |
| 2 $\Theta$ range for data        | 5.574 to 59.19                                                   | 5.004 to                                                         | 5.77 to 52.744                                                                 | 4.194 to 58.366                                                   |



|                                                |                                                                     |                                                                     |                                                                     |                                                                     |
|------------------------------------------------|---------------------------------------------------------------------|---------------------------------------------------------------------|---------------------------------------------------------------------|---------------------------------------------------------------------|
| collection/°                                   | 59.196                                                              |                                                                     |                                                                     |                                                                     |
| Index ranges                                   | -21 ≤ h ≤ 21, -<br>20 ≤ k ≤ 20, -<br>6 ≤ l ≤ 8                      | -9 ≤ h ≤ 9, -18<br>≤ k ≤ 17, -11<br>≤ l ≤ 11                        | -13 ≤ h ≤ 13, -5<br>≤ k ≤ 5, -28 ≤ l<br>≤ 28                        | -12 ≤ h ≤ 12, -<br>29 ≤ k ≤ 25, -15<br>≤ l ≤ 15                     |
| Reflections collected                          | 10403                                                               | 12815                                                               | 9707                                                                | 33977                                                               |
| Independent reflections                        | 1898 [R <sub>int</sub> =<br>0.0499, R <sub>sigma</sub> =<br>0.0413] | 4333 [R <sub>int</sub> =<br>0.0374, R <sub>sigma</sub> =<br>0.0504] | 2300 [R <sub>int</sub> =<br>0.0410, R <sub>sigma</sub> =<br>0.0377] | 5690 [R <sub>int</sub> =<br>0.0680, R <sub>sigma</sub> =<br>0.0540] |
| Data/restraints/parameters                     | 1898/0/57                                                           | 4333/1/121                                                          | 2300/0/106                                                          | 5690/0/200                                                          |
| Goodness-of-fit on F <sup>2</sup>              | 1.030                                                               | 1.020                                                               | 1.057                                                               | 1.026                                                               |
| Final R indexes [I ≥ 2σ<br>(I)]                | R <sub>1</sub> = 0.0373,<br>wR <sub>2</sub> = 0.0869                | R <sub>1</sub> = 0.0285,<br>wR <sub>2</sub> = 0.0526                | R <sub>1</sub> = 0.0323,<br>wR <sub>2</sub> = 0.0908                | R <sub>1</sub> = 0.0365,<br>wR <sub>2</sub> = 0.0677                |
| Final R indexes [all data]                     | R <sub>1</sub> = 0.0636,<br>wR <sub>2</sub> = 0.0970                | R <sub>1</sub> = 0.0405,<br>wR <sub>2</sub> = 0.0551                | R <sub>1</sub> = 0.0398,<br>wR <sub>2</sub> = 0.0951                | R <sub>1</sub> = 0.0789,<br>wR <sub>2</sub> = 0.0786                |
| Largest diff. peak/hole / e<br>Å <sup>-3</sup> | 2.33/-0.70                                                          | 0.60/-0.66                                                          | 0.92/-0.70                                                          | 1.00/-0.88                                                          |
| Flack parameter                                | -                                                                   | 0.041(9)                                                            | -                                                                   | -                                                                   |

**Table S2.** Selected bond lengths (Å) and Bond Valences for DMESnBr<sub>4</sub>, DMESnBr<sub>6</sub>, TMDPSn<sub>2</sub>Br<sub>6</sub> and TMDPSnBr<sub>6</sub>.

|                                     | Atom | Bond length<br>R <sub>ij</sub> (Å) | R <sub>0</sub> | B    | Bond<br>Valence S <sub>ij</sub> |
|-------------------------------------|------|------------------------------------|----------------|------|---------------------------------|
| DMESnBr <sub>4</sub>                | Sn1  |                                    |                |      | 1.65                            |
|                                     | Br1  | 2.9978                             | 2.53           | 0.35 | -0.26                           |
|                                     | Br2  | 2.9978                             | 2.53           | 0.35 | -0.26                           |
|                                     | Br3  | 2.7195                             | 2.53           | 0.35 | -0.58                           |
|                                     | Br4  | 2.742                              | 2.53           | 0.35 | -0.55                           |
| DMESnBr <sub>6</sub>                | Sn1  |                                    |                |      | 3.50                            |
|                                     | Br1  | 2.5772                             | 2.4            | 0.37 | -0.62                           |
|                                     | Br2  | 2.596                              | 2.4            | 0.37 | -0.63                           |
|                                     | Br3  | 2.6137                             | 2.4            | 0.37 | -0.56                           |
|                                     | Br4  | 2.5953                             | 2.4            | 0.37 | -0.59                           |
|                                     | Br5  | 2.6282                             | 2.4            | 0.37 | -0.54                           |
|                                     | Br6  | 2.6183                             | 2.4            | 0.37 | -0.55                           |
| TMDPSn <sub>2</sub> Br <sub>6</sub> | Sn1  |                                    |                |      | 1.70                            |
|                                     | Br1  | 2.7619                             | 2.53           | 0.35 | -0.52                           |
|                                     | Br2  | 2.6969                             | 2.53           | 0.35 | -0.62                           |
|                                     | Br3  | 2.7307                             | 2.53           | 0.35 | -0.56                           |
| TMDPSnBr <sub>6</sub>               | Sn1  |                                    |                |      | 3.51                            |
|                                     | Br1  | 2.6263                             | 2.4            | 0.37 | -0.54                           |
|                                     | Br2  | 2.6353                             | 2.4            | 0.37 | -0.53                           |
|                                     | Br3  | 2.5701                             | 2.4            | 0.37 | -0.63                           |
|                                     | Br4  | 2.6205                             | 2.4            | 0.37 | -0.55                           |
|                                     | Br5  | 2.5732                             | 2.4            | 0.37 | -0.63                           |
|                                     | Br6  | 2.5739                             | 2.4            | 0.37 | -0.63                           |

## References:

1. O. V. Dolomanov, L. J. Bourhis, R. J. Gildea, J. A. K. Howard and H. Puschmann, OLEX2: a complete structure solution, refinement and analysis program, *J. Appl. Crystallogr.*, 2009, **42**, 339-341.
2. L. J. Bourhis, O. V. Dolomanov, R. J. Gildea, J. A. Howard and H. Puschmann, The anatomy of a comprehensive constrained, restrained refinement program for the modern computing environment - Olex2 dissected, *Acta Crystallogr. A Found Adv.*, 2015, **71**, 59-75.
3. G. M. Sheldrick, A short history of SHELX, *Acta Crystallogr. A*, 2008, **64**, 112-122.
4. W. Song, K. Leung, Q. Shao, K. J. Gaskell and J. E. Reutt-Robey, Complexation and Phase Evolution at Dimethylformamide–Ag(111) Interfaces, *J. Phys. Chem. C*, 2016, **120**, 22979-22988.
5. S. K. Kurtz and T. T. Perry, A Powder Technique for the Evaluation of Nonlinear Optical Materials, *J. Appl. Phys.*, 1968, **39**, 3798-3813.
6. G. Kresse and J. Furthmüller, Efficiency of ab-initio total energy calculations for metals and semiconductors using a plane-wave basis set, *Comp. Mater. Sci.*, 1996, **6**, 15-50.
7. G. Kresse and J. Furthmüller, Efficient iterative schemes for ab initio total-energy calculations using a plane-wave basis set, *Phys. Rev. B Condens. Matter*, 1996, **54**, 11169-11186.
8. J. P. Perdew, K. Burke and M. Ernzerhof, Generalized Gradient Approximation Made Simple, *Phys. Rev. Lett.*, 1996, **77**, 3865-3868.
9. J. P. Perdew, K. Burke and M. Ernzerhof, Generalized Gradient Approximation Made Simple [Phys. Rev. Lett. 77, 3865 (1996)], *Phys. Rev. Lett.*, 1997, **78**, 1396-1396.
10. H. J. Monkhorst and J. D. Pack, Special points for Brillouin-zone integrations, *Phys. Rev. B*, 1976, **13**, 5188-5192.
